# Supplementary material
Source: PubMed Central journal article supplement (PMC6246897)
Supplement: zii999092610s1.pdf [file zii999092610s1.pdf]

**Polymorphisms in Receptors Involved in Opsonic and Nonopsonic Phagocytosis,  
and the Risk of Infection in Oncohematology Patients**

M<sup>a</sup> Carmen Herrero-Sánchez, Eduardo B. Angomás, Cristina de Ramón, Juan J. Tellería, Luis A. Corchete, Sara Alonso, M<sup>a</sup> del Carmen Ramos, María J. Peñarrubia, Saioa Márquez, Nieves Fernández, Luis J. García Frade, Mariano Sánchez Crespo

**Supplementary data**

A

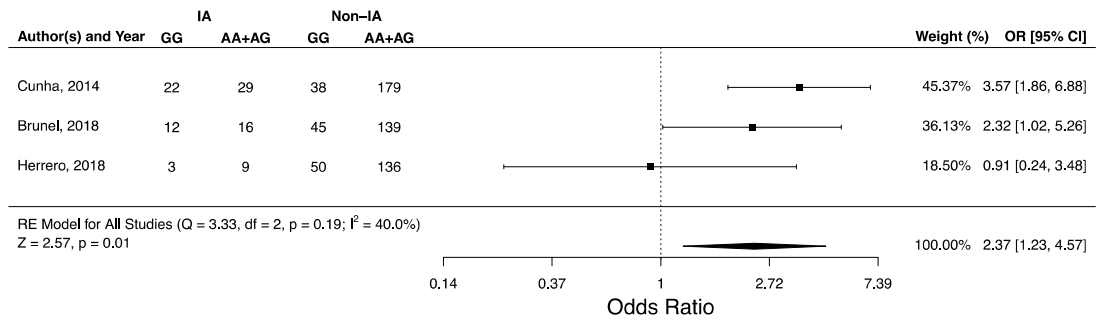

B

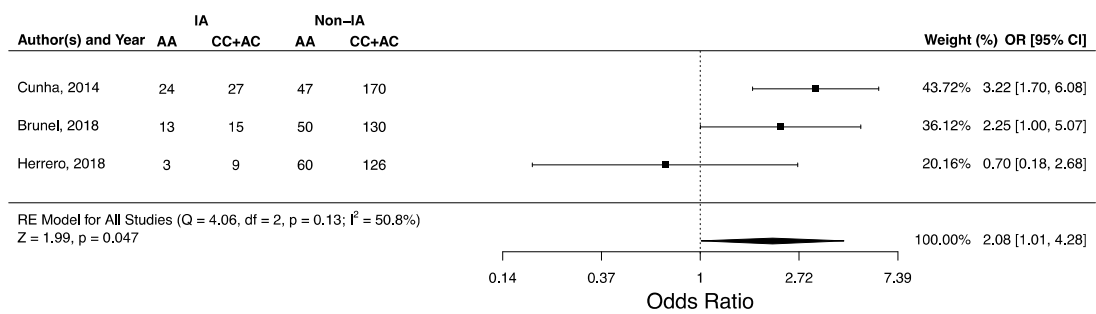

C

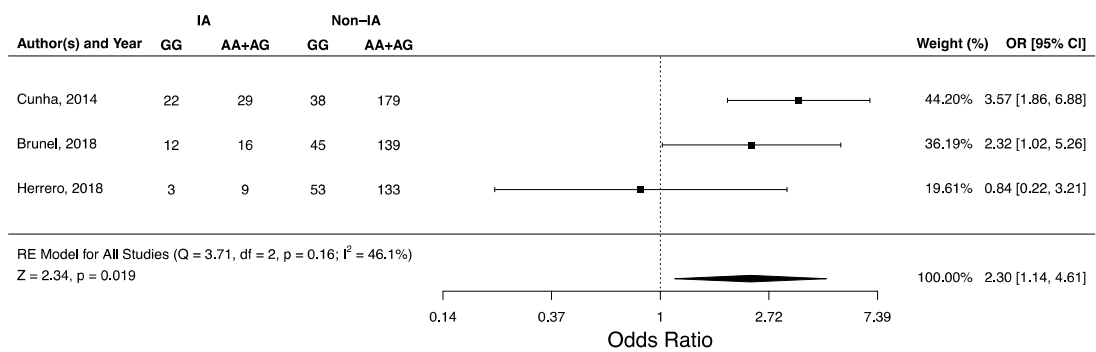

**FIG S1** Forest plots of association between *PTX3* SNPs and invasive aspergillosis (IA) in hematological patients. For each *PTX3* SNPs, a forest plot showing the odds ratio of each study using a random effects model meta-analysis. Summary estimated odds ratio are represented as a diamond at the bottom for each analysed SNP. (A) rs2305619, (B) rs3816527 and (C) rs1840680.

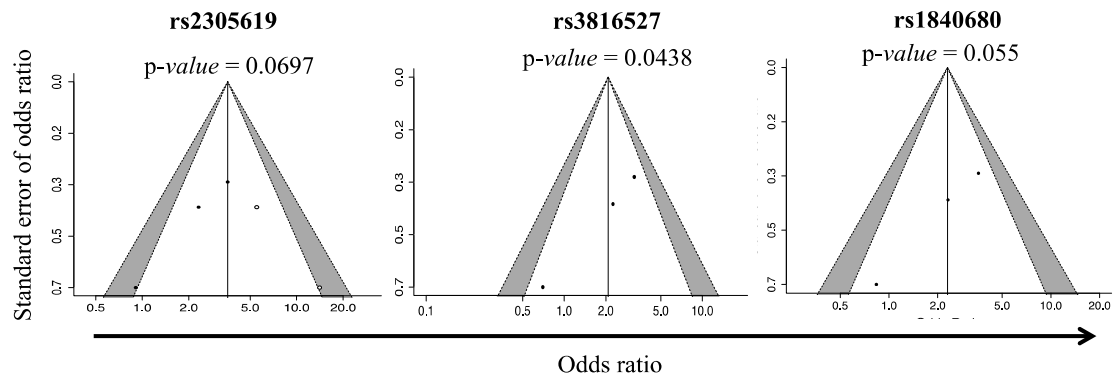

**FIG S2** Funnel plots of association between *PTX3* SNPs and IA. For each *PTX3* SNPs, a funnel plot to identify publication bias was produced. Egger's asymmetry test p-value was also shown for each funnel plot.

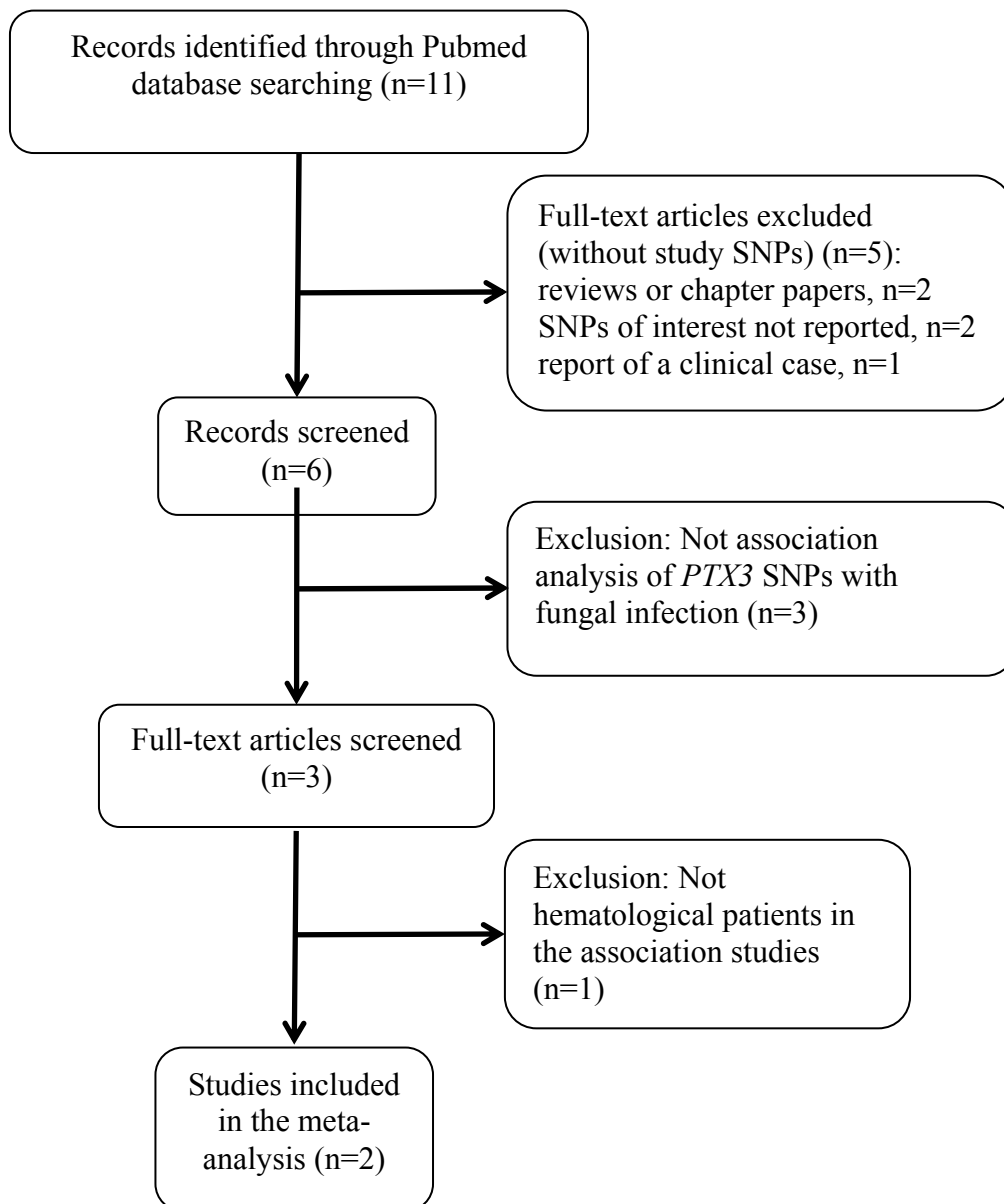

**FIG S3** Flow chart of study selection in meta-analysis

**TABLE S1** Genotype distribution of rs16910526 in patients presenting *Candida spp* and *Aspergillus spp*.

| <i>rs_number</i>  | <i>Model</i> | <i>Genotype</i> | <i>With CAD (%)</i> | <i>Without CAD (%)</i> | <i>OR (95% CI)</i> | <i>P-value</i> | <i>BIC</i> |
|-------------------|--------------|-----------------|---------------------|------------------------|--------------------|----------------|------------|
| <b>rs16910526</b> | Codominant   | TT              | 80 (89.9%)          | 89 (81.7%)             | 1.00               | 0.16           | 318.4      |
|                   |              | TG              | 8 (9%)              | 18 (16.5%)             | 2.38 (0.94-6.02)   |                |            |
|                   |              | GG              | 1 (1.1%)            | 2 (1.8%)               | 1.6 (0.13-20.16)   |                |            |
|                   | Dominant     | TT              | 80 (89.9%)          | 89 (81.7%)             | 1.00               | 0.058          | 313.2      |
|                   |              | TG+GG           | 9 (10.1%)           | 20 (18.4%)             | 2.28 (0.95-5.51)   |                |            |
|                   | Recessive    | TT+TG           | 88 (98.9%)          | 107 (98.2%)            | 1.00               | 0.77           | 316.7      |
| GG                |              | 1 (1.1%)        | 2 (1.8%)            | 1.45 (0.12-18.3)       |                    |                |            |

Association analysis for the 198 patients was adjusted for sex, age, and hematological malignancy. Abbreviations: **CAD**, *Candida spp* and/or *Aspergillus spp* detection; **OR**, odds ratio; **CI**, confidence intervals; **BIC**, Bayesian information criterion.

**TABLE S2** Association of SNP rs16910526 with fungal colonization

| <i>rs_number</i>  | <i>Model</i> | <i>Genotype</i> | <i>With FC (%)</i> | <i>Without FC (%)</i> | <i>OR (95% CI)</i> | <i>P-value</i> | <i>BIC</i> |
|-------------------|--------------|-----------------|--------------------|-----------------------|--------------------|----------------|------------|
| <b>rs16910526</b> | Codominant   | TT              | 64 (90.1%)         | 89 (82.7%)            | 1.00               | 0.15           | 299.4      |
|                   |              | TG              | 6 (8.4%)           | 20 (15.8%)            | 2.61 (0.93-7.32)   |                |            |
|                   |              | GG              | 1 (1.4%)           | 2 (1.6%)              | 1.12 (0.1-14.48)   |                |            |
|                   | Dominant     | TT              | 64 (90.1%)         | 105 (82.7%)           | 1.00               | 0.066          | 294.5      |
|                   |              | TG+GG           | 7 (9.9%)           | 22 (17.3%)            | 2.37 (0.9-6.21)    |                |            |
|                   | Recessive    | TT+TG           | 70 (98.6%)         | 125 (98.4%)           | 1.00               | 0.99           | 297.9      |
| GG                |              | 1 (1.4%)        | 2 (1.6%)           | 1.02 (0.1-13.14)      |                    |                |            |

Model adjusted for sex, age, and hematological malignancy for high-risk hematological

patients with and without fungal colonization by *Aspergillus* spp. and *Candida* spp.

Abbreviations: **FC**, fungal colonization.

**TABLE S3** Fungal colonization and SNP rs16910526 in patients receiving antifungal prophylaxis

| <i>rs_number</i>  | <i>Model</i>    | <i>Genotype</i> | <i>With FC (%)</i> | <i>Without FC (%)</i> | <i>OR (95% CI)</i>      | <i>P-value</i> | <i>BIC</i>   |
|-------------------|-----------------|-----------------|--------------------|-----------------------|-------------------------|----------------|--------------|
| <b>rs16910526</b> | Codominant      | TT              | 49 (92.5%)         | 71 (81.6%)            | 1.00                    | 0.028          | 210.8        |
|                   |                 | TG              | 4 (7.5%)           | 14 (16.1%)            | 3.7 (1.01-13.54)        |                |              |
|                   |                 | GG              | 0 (0%)             | 2 (2.3%)              | NA (0.00-NA)            |                |              |
|                   | <b>Dominant</b> | <b>TT</b>       | <b>49 (92.5%)</b>  | <b>71 (81.6%)</b>     | <b>1.00</b>             | <b>0.013</b>   | <b>206.8</b> |
|                   |                 | <b>TG+GG</b>    | <b>4 (7.5%)</b>    | <b>16 (18.4%)</b>     | <b>4.36 (1.22-15.6)</b> |                |              |
|                   | Recessive       | TT+TG           | 53 (100%)          | 85 (97.7%)            | 1.00                    | 0.1            | 210.4        |
| GG                |                 | 0 (0%)          | 2 (2.3%)           | NA (0.00-NA)          |                         |                |              |

Association analysis for the 140 patients undergoing antifungal prophylaxis was adjusted for sex, age, and hematological malignancy, using SNPStats program.

**TABLE S4** Genotype association of rs16910526 in hematological patients receiving antifungal prophylaxis and undergoing colonization by *Candida* spp.

| <i>rs_number</i>  | <i>Model</i> | <i>Genotype</i> | <i>With CC (%)</i> | <i>Without CC (%)</i> | <i>OR (95% CI)</i> | <i>P-value</i> | <i>BIC</i> |
|-------------------|--------------|-----------------|--------------------|-----------------------|--------------------|----------------|------------|
| <b>rs16910526</b> | Codominant   | TT              | 43 (91.5%)         | 77 (82.8%)            | 1.00               | 0.076          | 205.3      |
|                   |              | TG              | 4 (8.5%)           | 14 (15.1%)            | 3.04 (0.8-11.44)   |                |            |
|                   |              | GG              | 0 (0%)             | 2 (2.1%)              | NA (0.00-NA)       |                |            |
|                   | Dominant     | TT              | 43 (91.5%)         | 77 (82.8%)            | 1.00               | 0.038          | 201.2      |
|                   |              | TG+GG           | 4 (8.5%)           | 16 (17.2%)            | 3.54 (0.97-12.9)   |                |            |
|                   | Recessive    | TT+TG           | 47 (100%)          | 91 (97.8%)            | 1.00               | 0.15           | 203.4      |
| GG                |              | 0 (0%)          | 2 (2.1%)           | NA (0.00-NA)          |                    |                |            |

Genetic association study adjusted for sex, age, and hematological malignancy, using SNPStats program. Abbreviations: **CC**, *Candida* colonization.



**TABLE S5** Genotype frequency of SNP rs16910526 in patients with and without antifungal prophylaxis

| Genotype  | 140 patients AP   |                      | 58 patients NO AP |                      |
|-----------|-------------------|----------------------|-------------------|----------------------|
|           | With colonization | Without colonization | With colonization | Without colonization |
| <b>TT</b> | 49 (92.5%)        | 71 (81.6%)           | 15 (83.3%)        | 34 (84%)             |
| <b>TG</b> | 4 (7.5%)          | 14 (16.1%)           | 2 (11.1%)         | 5 (15%)              |
| <b>GG</b> | 0 (0%)            | 2 (2.3%)             | 1 (5.6%)          | 0 (0%)               |

Genotype distribution and the incidence of fungal colonization were assessed in patients with and without AP.

**TABLE S6** Genotype association between SNP rs2078178 and fungal colonization in patients with antifungal prophylaxis

| <i>rs_number</i>  | <i>Model</i> | <i>Genotype</i> | <i>With FC (%)</i> | <i>Without FC (%)</i> | <i>OR (95% CI)</i> | <i>P-value</i> | <i>BIC</i> |
|-------------------|--------------|-----------------|--------------------|-----------------------|--------------------|----------------|------------|
| <b>rs16910526</b> | Codominant   | CC              | 37 (69.8%)         | 44 (50.6%)            | 1.00               | 0.062          | 212.4      |
|                   |              | TC              | 15 (28.3%)         | 39 (44.8%)            | 2.02 (0.92-4.47)   |                |            |
|                   |              | TT              | 1 (1.9%)           | 4 (4.6%)              | 6.85 (0.64-72.9)   |                |            |
|                   | Dominant     | CC              | 37 (69.8%)         | 44 (50.6%)            | 1.00               | 0.036          | 208.7      |
|                   |              | TC+TT           | 16 (30.2%)         | 43 (49.4%)            | 2.25 (1.04-4.87)   |                |            |
|                   | Recessive    | CC+TC           | 52 (98.1%)         | 83 (95.4%)            | 1.00               | 0.12           | 210.6      |
| TT                |              | 1 (1.9%)        | 4 (4.6%)           | 5.33 (0.5-55.06)      |                    |                |            |

Association studies for SNP rs2078178 in the 140 patients undergoing antifungal prophylaxis. Analysis adjusted for sex, age, and hematological malignancy.

**TABLE S7** Tolerance analysis for the substitution of an aspartic acid for an alanine in the 48 position as a consequence of polymorphism rs3816527

*In silico* study was performed by SIFT program using orthologues in the protein alignment (**A**) and homologues in the protein alignment (**B**)

**A**

| SNP       | Amino acid change | Protein ID | Amino acid | Using orthologues in the protein alignment |       |             |                        |
|-----------|-------------------|------------|------------|--------------------------------------------|-------|-------------|------------------------|
|           |                   |            |            | Prediction                                 | Score | Median Info | Alignment              |
| rs3816527 | A48D              | NP_002843  | A          | TOLERATED                                  | 1.00  | 3.18        | Alignment of best hits |
|           |                   |            | D          | TOLERATED                                  | 0.59  |             |                        |

**B**

| SNP       | Amino acid change | Protein ID | Amino acid | Using orthologues in the protein alignment |       |             |                        |
|-----------|-------------------|------------|------------|--------------------------------------------|-------|-------------|------------------------|
|           |                   |            |            | Prediction                                 | Score | Median Info | Alignment              |
| rs3816527 | A48D              | NP_002843  | A          | TOLERATED                                  | 1.00  | 3.18        | Alignment of best hits |
|           |                   |            | D          | TOLERATED                                  | 0.59  |             |                        |

**TABLE S8** Primer sequences used for KASP assays

| <i>Gene</i>          | <i>rs_number</i> | <i>Primer sequences</i>                                                                           |
|----------------------|------------------|---------------------------------------------------------------------------------------------------|
| <b><i>CLEC7A</i></b> | rs16910631       | Labeled 5'-TCAAAGGATTATTGCGGGAATTAAA[T/C]-3' [HEX/FAM]<br>Common 5'-AAGGTGCTTTTATATGTGTTAGCTC-3'  |
|                      | rs2078178        | Labeled 5'-CCATGAAAACCTGCCTAGGGGGACTG[C/T]-3' [HEX/FAM]<br>Common 5'-AACCTATCTGACAAAATCCCAGATG-3' |
|                      | rs16910526       | Labeled 5'-ACCAACTGTGTAGTGTGCCCTCATA[G/T]-3' [HEX/FAM]<br>Common 5'-TTGAAAACCTTCTTCTCACAAATACT-3' |
| <b><i>PTX3</i></b>   | rs2305619        | Labeled 5'-CCATCCCCTGAGGACCGTAAGTTC[G/A]-3' [HEX/FAM]<br>Common 5'-AGGGTTAGCAGAGAAACAGTTAAAG-3'   |
|                      | rs3816527        | Labeled 5'-TCCCGTACTCTAGCCACGCCGTGCG[C/A]-3' [HEX/FAM]<br>Common 5'-CCATTCCGAGTGCTCCTGACCGCAG-3'  |
|                      | rs1840680        | Labeled 5'-GGGCCCTTACACCCGATCCGACTA[G/A]-3' [HEX/FAM]<br>Common 5'-ACGGGCCAGTGGACTCCTGCAGCGC-3'   |

**TABLE S9** Primer sequences used for amplification of *CLEC7A*, *PTX3* and *GAPDH*

genes

| <i>Gene</i>   | <i>Primer</i> | <i>Sequence</i>             |
|---------------|---------------|-----------------------------|
| <i>CLEC7A</i> | Forward       | 5'-GGGCTCTCAAGAACAATGGA-3'  |
|               | Reverse       | 5'-TGAGGGCACACTACACAGTTG-3' |
| <i>PTX3</i>   | Forward       | 5'-TGCGATTCTGTTTTGTGCTC-3'  |
|               | Reverse       | 5'-TGAAGAGCTTGTCCCATTCC-3'  |
| <i>GAPDH</i>  | Forward       | 5'-GTCAGTGGTGGACCTGACCT-3'  |
|               | Reverse       | 5'-AGGGGAGATTCAGTGTGGTG-3'  |
